# Supplementary material
Source: PubMed Central journal article supplement (PMC5079610)
Supplement: DC161170SupplementaryData.pdf [file DC161170SupplementaryData.pdf]

SUPPLEMENTARY DATA

**Stratification analysis by age groups <45, 45-60, >=60**

**Supplementary Table 2.1 FEV1, FVC and dyspnea in DM and non-DM participants for age<45 (n=5976)**

|               | Without lung disease(N=4960) |                  | With lung disease(N=1016) |                              |
|---------------|------------------------------|------------------|---------------------------|------------------------------|
|               | Non-DM(N=4630)               | DM(N=330)        | Non-DM(N=929)             | DM(N=87)                     |
| FEV1(L), mean | 3.33(3.30-3.35)              | 3.17(3.10-3.24)‡ | 3.27(3.22-3.31)           | 3.14(3.02-3.26)*             |
| FVC(L), mean  | 4.02(3.99-4.05)              | 3.81(3.73-3.89)‡ | 4.03(3.98-4.07)           | 3.82(3.69-3.95) <sup>+</sup> |
| Dyspnea, mean | 0.59(0.52-0.66)              | 0.60(0.44-0.75)  | 1.05(0.91-1.19)           | 1.29(0.83-1.75)              |

Values shown are weighted for study design and nonresponse. Results presented as mean and 95% Confidence interval.

Adjusted for gender, height, weight circumference, Latino Background, cumulative smoking and heart failure, coronary artery disease and CRP.

‡P<0.001 compared to Non-DM.

SUPPLEMENTARY DATA

**Supplementary Table 2.2 FEV1, FVC and dyspnea in DM and non-DM participants for 45=<age<60(n=6031)**

|               | Without lung disease(N=4925) |                              | With lung disease(N=1106) |                              |
|---------------|------------------------------|------------------------------|---------------------------|------------------------------|
|               | Non-DM(N=3730)               | DM(N=1195)                   | Non-DM(N=782)             | DM(N=324)                    |
| FEV1(L), mean | 2.87(2.84-2.89)              | 2.74(2.67-2.81) <sup>‡</sup> | 2.69(2.64-2.74)           | 2.61(2.52-2.69)*             |
| FVC(L), mean  | 3.63(3.60-3.66)              | 3.44(3.38-3.50) <sup>‡</sup> | 3.49(3.44-3.54)           | 3.37(3.27-3.46)*             |
| Dyspnea, mean | 0.68(0.62-0.75)              | 0.85(0.73-0.97)*             | 1.43(1.24-1.62)           | 1.91(1.60-2.22) <sup>+</sup> |

Values shown are weighted for study design and nonresponse. Results presented as mean and 95% Confidence interval.

Adjusted for gender, height, weight circumference, Latino Background, cumulative smoking and heart failure, coronary artery disease and CRP.

<sup>‡</sup>P<0.001 compared to Non-DM.

SUPPLEMENTARY DATA

**Supplementary Table 2.3 FEV1, FVC and dyspnea in DM and non-DM participants for age $\geq$ 60(n=2448)**

|               | Without lung disease(N=1925) |                              | With lung disease(N=523) |                              |
|---------------|------------------------------|------------------------------|--------------------------|------------------------------|
|               | Non-DM(N=1150)               | DM(N=775)                    | Non-DM(N=275)            | DM(N=248)                    |
| FEV1(L), mean | 2.51(2.47-2.55)              | 2.44(2.38-2.49)*             | 2.21(2.11-2.31)          | 2.05(1.91-2.18)*             |
| FVC(L), mean  | 3.29(3.23-3.35)              | 3.15(3.09-3.22) <sup>‡</sup> | 3.10(2.98-3.22)          | 2.86(2.72-3.01) <sup>+</sup> |
| Dyspnea, mean | 0.67(0.56-0.77)              | 0.89(0.71-1.07)*             | 1.26(0.94-1.57)          | 2.05(1.61-2.49) <sup>+</sup> |

Values shown are weighted for study design and nonresponse. Results presented as mean and 95% Confidence interval.

Adjusted for gender, height, weight circumference, Latino Background, cumulative smoking and heart failure, coronary artery disease and CRP.

<sup>‡</sup>P<0.001 compared to Non-DM.

SUPPLEMENTARY DATA

**Supplementary Table 2. stratification analysis by smoking status: never, ever.**

**Supplementary Table 2.4 FEV1, FVC and dyspnea in DM and non-DM participants for non-smoker (n=8833)**

|               | <b>Without lung disease(N=7412)</b> |                              | <b>With lung disease(N=1421)</b> |                              |
|---------------|-------------------------------------|------------------------------|----------------------------------|------------------------------|
|               | <b>Non-DM(N=6057)</b>               | <b>DM(N=1355)</b>            | <b>Non-DM(N=1110)</b>            | <b>DM(N=311)</b>             |
| FEV1(L), mean | 3.14(3.12-3.15)                     | 3.03(2.99-3.07) <sup>‡</sup> | 2.99(2.96-3.03)                  | 2.85(2.77-2.94) <sup>+</sup> |
| FVC(L), mean  | 3.83(3.81-3.85)                     | 3.62(3.58-3.67) <sup>‡</sup> | 3.74(3.70-3.77)                  | 3.54(3.44-3.63) <sup>‡</sup> |
| Dyspnea, mean | 0.55(0.51-0.60)                     | 0.75(0.63-0.86) <sup>+</sup> | 1.05(0.93-1.18)                  | 1.55(1.23-1.86) <sup>+</sup> |

Values shown are weighted for study design and nonresponse. Results presented as mean and 95% Confidence interval.

Adjusted for age, gender, height, weight circumference, Latino Background, heart failure, coronary artery disease and CRP.

<sup>‡</sup>P<0.001 <sup>+</sup>p<0.01 \*P<0.05 compared to Non-DM.

SUPPLEMENTARY DATA

**Supplementary Table 2.5 FEV1, FVC and dyspnea in DM and non-DM participants for ever smoker(n=5622)**

|               | Without lung disease(N=4398) |                   | With lung disease(N=1224) |                              |
|---------------|------------------------------|-------------------|---------------------------|------------------------------|
|               | Non-DM(N=3453)               | DM(N=945)         | Non-DM(N=876)             | DM(N=348)                    |
| FEV1(L), mean | 3.11(3.08-3.13)              | 3.04(3.00-3.09)*  | 3.02(2.97-3.07)           | 2.93(2.85-3.02)              |
| FVC(L), mean  | 3.85(3.81-3.88)              | 3.71(3.66-3.76) ‡ | 3.86(3.80-3.91)           | 3.66(3.56-3.76) ‡            |
| Dyspnea, mean | 0.74(0.67-0.81)              | 0.94(0.79-1.08)*  | 1.34(1.15-1.54)           | 1.83(1.51-2.16) <sup>+</sup> |

Values shown are weighted for study design and nonresponse. Results presented as mean and 95% Confidence interval.

Adjusted for age, gender, height, weight circumference, Latino Background, heart failure, coronary artery disease and CRP.

‡P<0.001 <sup>+</sup>p<0.01 \*P<0.05 compared to Non-DM.
